# Supplementary material
Source: Springer Nature journal article supplement (https://www.springermedizin.de/resource/supplementary/12985_2009_539_MOESM2_ESM.pdf/9608406)

### A. Platelet Gating via CD41 stain

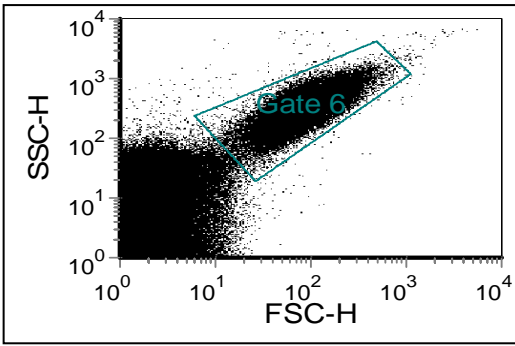

### B. - Ad

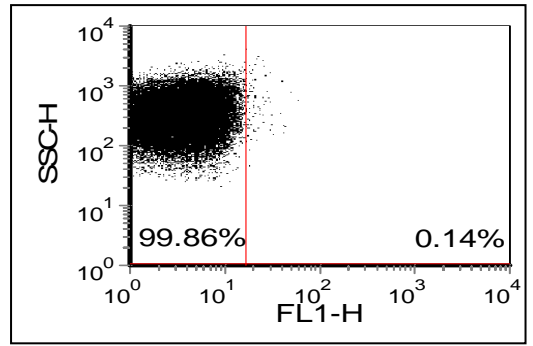

### C. + Ad

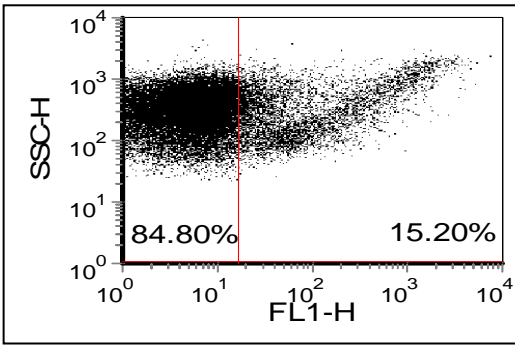

### D. + Ad + Thrombin

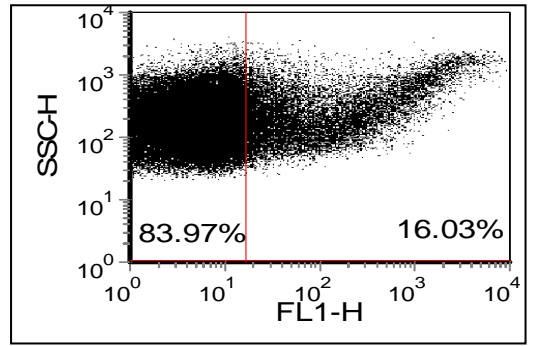

### E. + Ad + MnCl

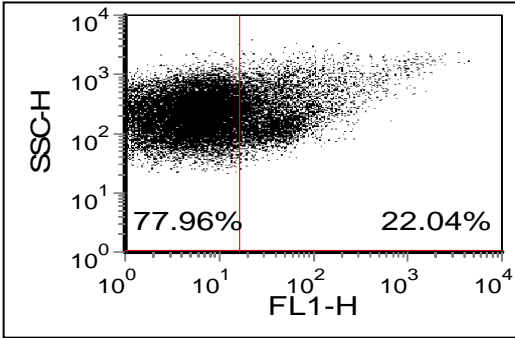

### F. + Ad + MnCl + Thrombin

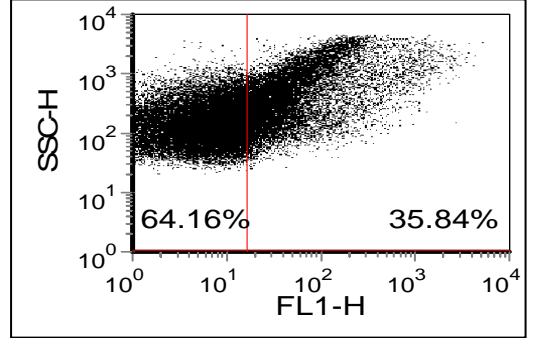

### G. -Ad → Annexin

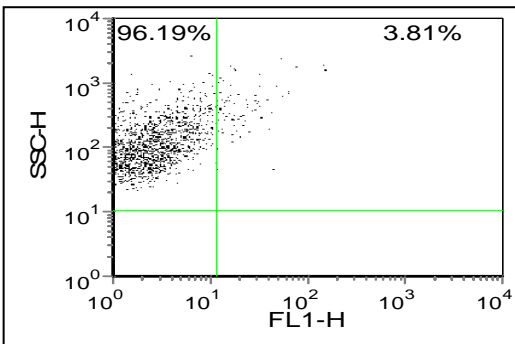

### H. +Ad → Annexin

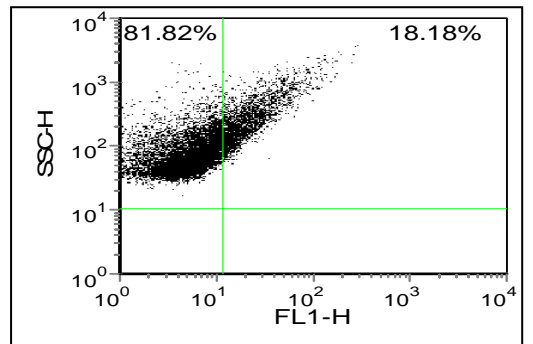

Supplement: MOESM2 [file 9608406]
